# Supplementary material for: Mechanistic basis for Sgo1-mediated centromere localization and function of the CPC
Source: PubMed Central journal article supplement (PMC9253516; doi:10.1083/jcb.202108156), 2022-07-01

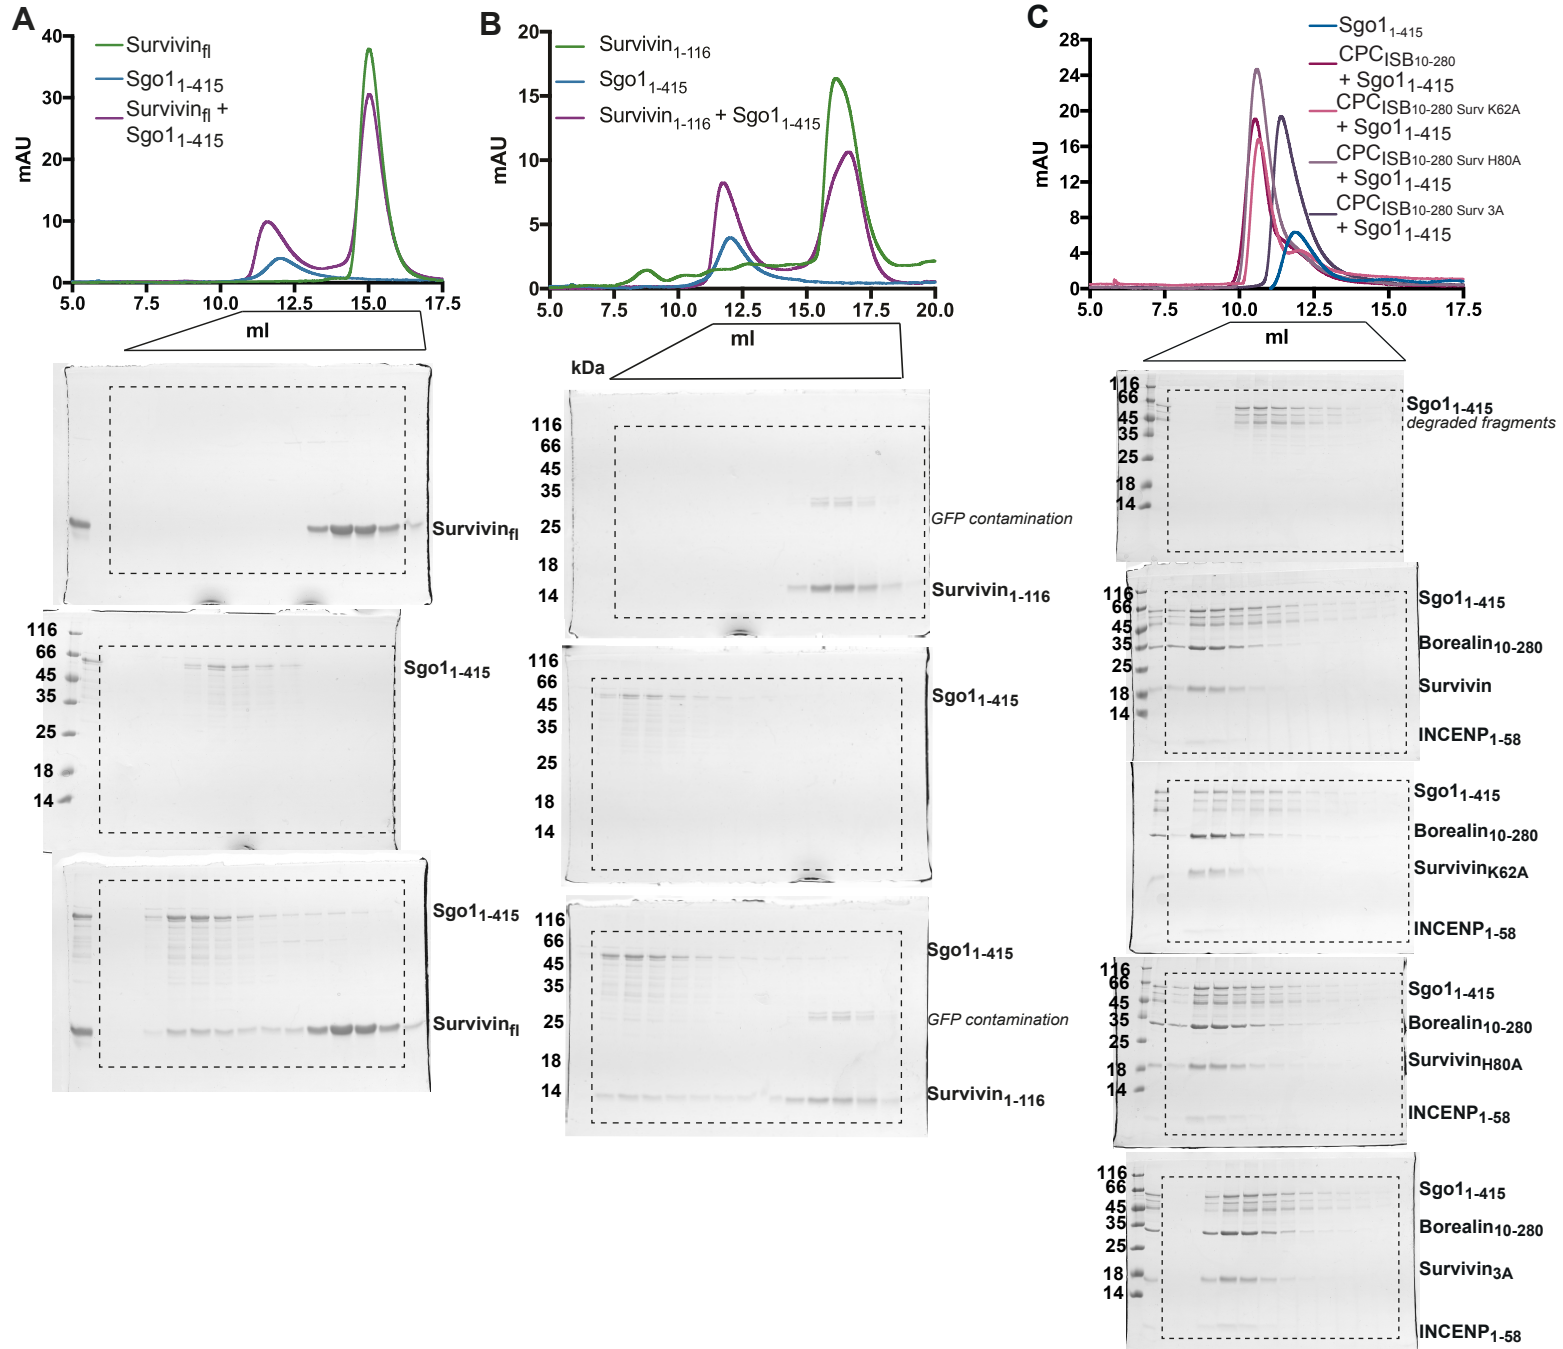

Supplement: JCB_202108156_SourceDataFS2.pdf [file JCB_202108156_SourceDataFS2.pdf]
